# Supplementary material for: Facile synthesis of Pt3Sn/graphene nanocomposites and their catalysis for electro-oxidation of methanol
Source: Royal Society of Chemistry journal article supplement (doi:10.1039/c2ce25662b), 2012-01-01
Supplement: c2ce25662b.pdf [file c2ce25662b.pdf]

## Facile synthesis of Pt<sub>3</sub>Sn /graphene nanocomposites and their catalysis for electro-oxidation of methanol

Wei Gao, Xiyan Li, Yunhui Li, Xiao Wang, Shuyan Song, and Hongjie Zhang\*

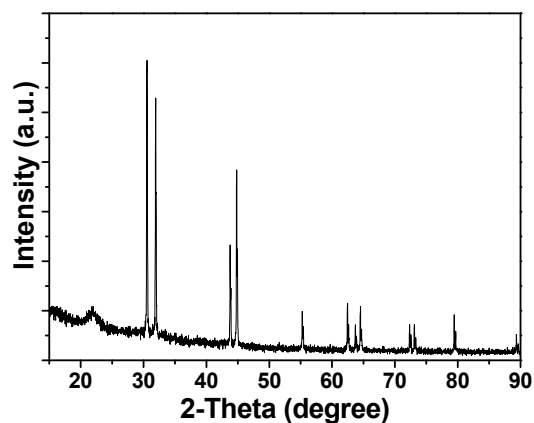

Fig. S1 XRD pattern of the Sn/graphene nanocomposites.

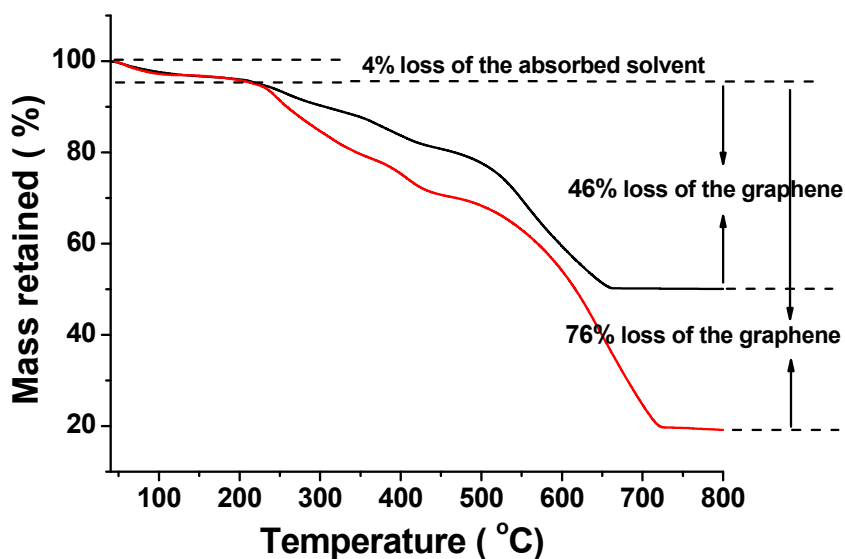

Fig. S2. TGA curves of Pt<sub>3</sub>Sn/graphene composites with the different Pt<sub>3</sub>Sn contents.

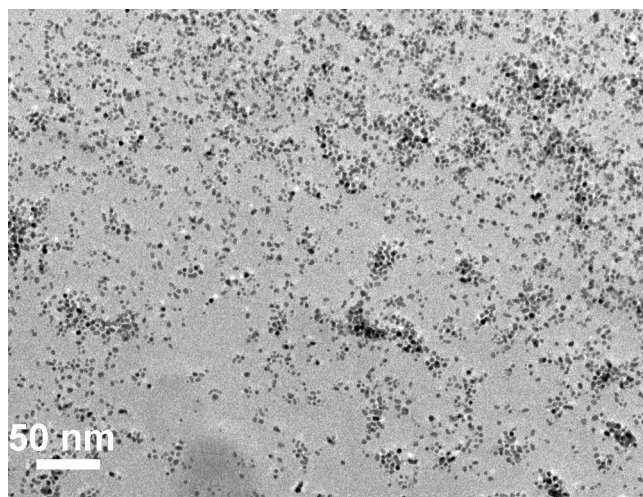

**Fig. S3.** TEM images of Pt<sub>3</sub>Sn/graphene composites with the Pt<sub>3</sub>Sn content of 20%.

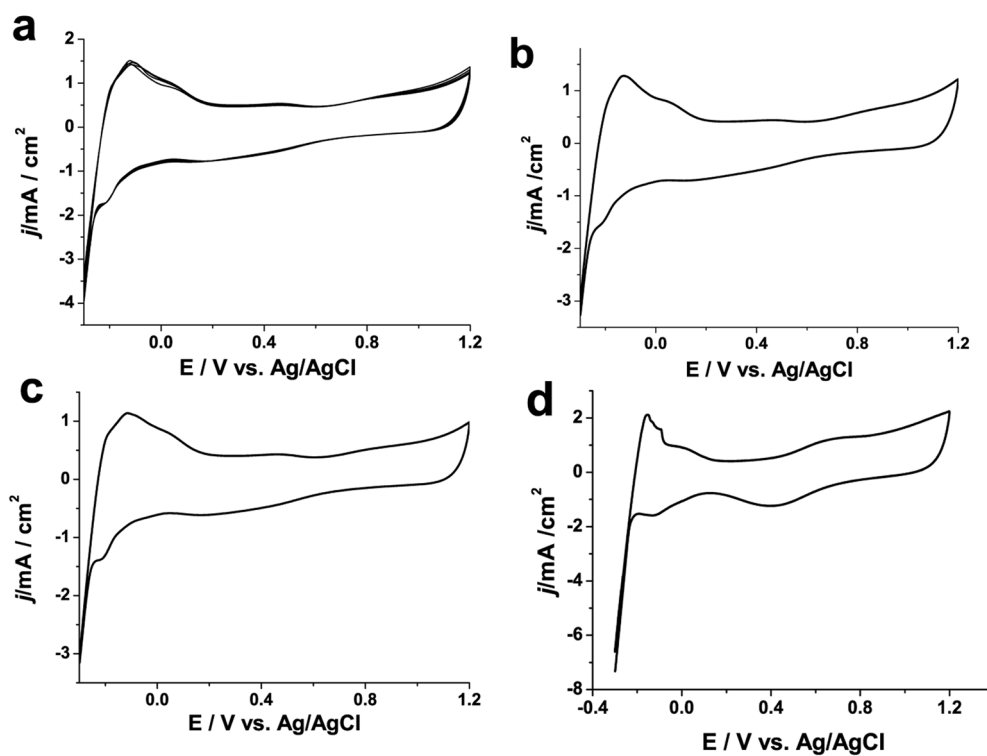

**Fig. S4** CVs of (a) the commercial Pt/C catalysts, (b) the Pt/graphene composites, (c) Pt<sub>3</sub>Sn/grapheme (20%) and (d) Pt<sub>3</sub>Sn/grapheme (50%).
